# Supplementary material for: Novel yeast-based biosensor for environmental monitoring of tebuconazole
Source: Springer Nature journal article supplement (doi:10.1007/s00253-023-12944-z), 2024-01-03
Supplement: MOESM1 [file 253_2023_12944_MOESM1_ESM.pdf]

## Supplementary Material

### Novel yeast-based biosensor for environmental monitoring of tebuconazole

Filipa Mendes<sup>1</sup>, Eduarda Miranda<sup>1</sup>, Leslie Amaral<sup>1</sup>, Carla Carvalho<sup>1,2</sup>, Bruno B. Castro<sup>1,3</sup>, Maria João Sousa<sup>1,3</sup>, Susana R. Chaves<sup>1\*</sup>

<sup>1</sup> CBMA – Centre of Molecular and Environmental Biology / ARNET – Aquatic Research Network, Department of Biology, School of Sciences, University of Minho, 4710-057 Braga, Portugal

<sup>2</sup> Present address: Centre for Environmental and Marine Studies (CESAM), Department of Biology, University of Aveiro, Aveiro, Portugal

<sup>3</sup> Institute of Science and Innovation for Bio-Sustainability (IB-S), School of Sciences, University of Minho, 4710-057 Braga, Portugal

\*Corresponding author: Susana R. Chaves; E-mail address: suchaves@bio.uminho.pt

**Table S1 List of *S. cerevisiae* strains and plasmids used in this study**

| Strain                | Genotype                                                                  | Source     |
|-----------------------|---------------------------------------------------------------------------|------------|
| BY4741                | MAT a his3 $\Delta$ 1; leu2 $\Delta$ 0; met15 $\Delta$ 0; ura3 $\Delta$ 0 | Euroscarf  |
| BY4741 pERG3pr-yNluc  | BY4741 harboring pRS426-ERG25pr-yNluc                                     | This Study |
| BY4741 pERG6pr-yNluc  | BY4741 harboring pRS426-ERG25pr-yNluc                                     | This Study |
| BY4741 pERG10pr-yNluc | BY4741 harboring pRS426-ERG25pr-yNluc                                     | This Study |
| BY4741 pERG11pr-yNluc | BY4741 harboring pRS426-ERG25pr-yNluc                                     | This Study |
| BY4741 pERG25pr-yNluc | BY4741 harboring pRS426-ERG25pr-yNluc                                     | This Study |
| Plasmid               | Description                                                               | Source     |

|                         |                                        |            |
|-------------------------|----------------------------------------|------------|
| p <i>ERG3</i> pr-yNluc  | <i>ERG3</i> promoter fused with yNluc  | This Study |
| p <i>ERG6</i> pr-yNluc  | <i>ERG6</i> promoter fused with yNluc  | This Study |
| p <i>ERG11</i> pr-yNluc | <i>ERG11</i> promoter fused with yNluc | This Study |
| p <i>ERG25</i> pr-yNluc | <i>ERG25</i> promoter fused with yNluc | This Study |

**Table S2 List of primers used in this study**

|                 | Forward Primer 5'–3'          | Reverse Primer 5'–3'                  |
|-----------------|-------------------------------|---------------------------------------|
| <i>ERG3</i> pr  | CACCATCGTCGTCCTCCTGTTC        | GATAATAAGAAAAATATTCGTCTAGATTGA        |
| <i>ERG6</i> pr  | TGCTCGCTATCCTCGCCATC          | AACAAGAATAAAATAATAATATAGTAGGCAGCATAAG |
| <i>ERG11</i> pr | CTTGTTCTCTCTCGCTTCCTACGTT     | GAATAGAAACAGAACAAACGAGTAATACAAGG      |
| <i>ERG25</i> pr | CTTTCATCCGTCTCGTTTATCATAA     | GTACAGCCATAAAAAAAGAGGAAAAGCTT         |
| yNluc           | ATGGTTTTTACTTTAGAAGATTTTGTTGG | GCGTTTATGTGAACGTATTTTAGCTTAA          |

**Table S3 Mutator phenotype of *mlh1Δ* cells exposed to tebuconazole (TEB)**

| Time (h)<br>Treatments    | <i>hom3-10</i> ( $\times 10^{-5}$ ) <sup>a</sup> |             |            |
|---------------------------|--------------------------------------------------|-------------|------------|
|                           | 24                                               | 48          | 72         |
| Control                   | 3.06 ± 2.3                                       | 1.56 ± 0.9  | 1.56 ± 1.5 |
| 500 μg L <sup>-1</sup>    | 1.21 ± 0.5                                       | 0.962 ± 0.6 | 1.16 ± 1.0 |
| 50 000 μg L <sup>-1</sup> | 1.03 ± 0.2                                       | 1.21 ± 0.9  | 1.37 ± 1.4 |

<sup>a</sup> Median frequency of seven cultures. Values not statistically significant (Mann–Whitney test).

To determine whether tebuconazole (TEB) is genotoxic and can induce genomic instability, fluctuation analysis (Lea and Coulson, 1949) was used. The reporter strain RDKY3615 *Δmlh1* carries a specific mutation that facilitates quantification of mutation rates, *hom3-10*. The *HOM3* gene encodes aspartate kinase (L-aspartate 4-P-transferase), a cytoplasmic enzyme necessary for threonine biosynthesis (Farfán et al., 1999). Thus, if yeast *hom3-10* mutants are grown on a medium lacking threonine, cells will die unless they revert the mutation. The strain also carrying a mutation in the *MLH1* gene, which plays a role in DNA repair, was used to facilitate measurements as it displays increased basal mutation frequencies (Argueso et al., 2003). Individual RDKY3615 *mlh1Δ* colonies were grown overnight in SC-Glucose medium with L-proline, diluted in fresh medium to

OD<sub>640 nm</sub> = 0.1 and grown for an additional 3 h. Afterwards, cells were exposed to 0, 500 or 50 000 µg L<sup>-1</sup> TEB. After 24, 48 and/or 72 h of treatment, cells were collected, washed, diluted in water, and appropriate dilutions plated on SC-Glucose medium (complete and lacking threonine). After 2 days at 30 °C, colonies were counted, and mutation frequencies calculated as described (Shell et al., 2007).

**Table S4 Environmental water sample locations and characteristics.** For each sample collected, characteristics such as temperature, dissolved oxygen (% saturation), total phosphorus, electrical conductivity (EC), total dissolved solids (TDS) and pH were determined

| <b>Sample</b> | <b>Name</b>      | <b>Type</b> | <b>River Basin</b> | <b>Latitude</b> | <b>Longitude</b> | <b>Temperature<br/>(°C)</b> | <b>Dissolved<br/>Oxygen<br/>(% sat.)</b> | <b>Total<br/>Phosphorus<br/>(mg P/L)</b> | <b>EC<br/>(µS/cm)</b> | <b>TDS<br/>(mg/L)</b> | <b>pH</b> |
|---------------|------------------|-------------|--------------------|-----------------|------------------|-----------------------------|------------------------------------------|------------------------------------------|-----------------------|-----------------------|-----------|
| <b>A</b>      | Ribeira do Tojal | River       | Cávado             | 41,684667       | -8,415025        | 18,4                        | 90                                       | 0,018                                    | 138                   | 87                    | 6,48      |
| <b>B</b>      | Rio Vez          | River       | Lima               | 41,880877       | -8,426432        | 20,0                        | 105                                      | 0,067                                    | 209                   | 138                   | 6,86      |
| <b>D</b>      | Refoios do Lima  | River       | Lima               | 41,781506       | -8,539807        | 23,1                        | 112                                      | 0,063                                    | 163                   | 105                   | 7,06      |
| <b>F</b>      | Caniçada         | Reservoir   | Cávado             | 41,676042       | -8,180388        | 23,2                        | 108                                      | 0,025                                    | 42                    | 27                    | 7,00      |
| <b>G</b>      | Oliveira         | River       | Ave                | 41,58626        | -8,22512         | 17,7                        | 102                                      | 0,012                                    | 137                   | 86                    | 6,82      |
| <b>H</b>      | Andorinhas       | Reservoir   | Ave                | 41,571226       | -8,179073        | 20,4                        | 93                                       | 0,015                                    | 109                   | 70                    | 6,64      |
| <b>I</b>      | Este (INL)       | River       | Ave                | 41,554336       | -8,398938        | 19,2                        | 86                                       | 0,122                                    | 240                   | 156                   | 6,97      |
| <b>J</b>      | Ucha             | River       | Cávado             | 41,569742       | -8,526438        | 18,8                        | 90                                       | 0,070                                    | 178                   | 115                   | 6,84      |

**Table S5 Limit of detection (LoD) and concentration of fungicides (carbendazim, cooper, dimetomorph, metalaxyl and TEB) detected at environmental water samples analyzed by analytical methods.** Samples where fungicide concentration is below the detection limit are identify as ND (not detected)

|                                    |       | Sample |       |      |      |       |       |       |       |
|------------------------------------|-------|--------|-------|------|------|-------|-------|-------|-------|
| Fungicide ( $\mu\text{g L}^{-1}$ ) | LoD   | A      | B     | D    | F    | G     | H     | I     | J     |
| Carbendazim                        | 0.002 | ND     | ND    | ND   | ND   | ND    | ND    | 0.015 | 0.003 |
| Copper                             | 0.15  | 2.16   | 1.16  | 0.92 | 1.71 | 1.09  | 0.91  | 3.19  | 6.03  |
| Dimetomorph                        | 0.002 | 0.028  | ND    | ND   | ND   | ND    | ND    | 0.005 | 0.006 |
| Metalaxyl                          | 0.002 | 0.043  | 0.006 | ND   | ND   | 0,005 | 0.003 | 0.003 | 0.006 |
| Tebuconazole (TEB)                 | 0.005 | 0.014  | ND    | ND   | ND   | ND    | ND    | ND    | ND    |

## Supplementary References

- Argueso, J.L., Kijas, A.W., Sarin, S., Heck, J., Waase, M., Alani, E., 2003. Systematic Mutagenesis of the *Saccharomyces cerevisiae* MLH1 Gene Reveals Distinct Roles for Mlh1p in Meiotic Crossing Over and in Vegetative and Meiotic Mismatch Repair. *Mol. Cell. Biol.* 23, 873–886.
- Farfán, M.-J., Aparicio, L., Calderón, I.L., 1999. Threonine overproduction in yeast strains carrying the HOM3-R2 mutant allele under the control of different inducible promoters. *Appl. Environ. Microbiol.* 65, 110–116.
- Lea, D.E., Coulson, C.A., 1949. The distribution of the numbers of mutants in bacterial populations. *J. Genet.* 49, 264–285.
- Shell, S.S., Putnam, C.D., Kolodner, R.D., 2007. The N Terminus of *Saccharomyces cerevisiae* Msh6 Is an Unstructured Tether to PCNA. *Mol. Cell* 26, 565–578.
